# Supplementary material for: MOF-derived and nitrogen-doped ZnSe polyhedra encapsulated by reduced graphene oxide as the anode for lithium and sodium storage
Source: Royal Society of Chemistry journal article supplement (doi:10.1039/c8ta09247h), 2018-01-01
Supplement: c8ta09247h1.pdf [file c8ta09247h1.pdf]

## **Supporting information**

### **MOF-Derived Nitrogen-Doped ZnSe Polyhedrons Encapsulated by Reduced Graphene Oxide as Anode for Lithium and Sodium Storage**

Xiaobin Liu,<sup>a</sup> Yongchang Liu<sup>a</sup>, Ming Feng<sup>\*b</sup> and Li-Zhen Fan<sup>\*a</sup>

<sup>a</sup>Beijing Advanced Innovation Center for Materials Genome Engineering, Institute of Advanced Materials and Technology, University of Science and Technology Beijing, Beijing 100083, China. E-mail: fanlizhen@ustb.edu.cn (L.-Z. Fan).

<sup>b</sup>Key Laboratory of Functional Materials Physics and Chemistry of the Ministry of Education, Jilin Normal University, Changchun 130103, P.R. China. Email: mingfeng@jlnu.edu.cn

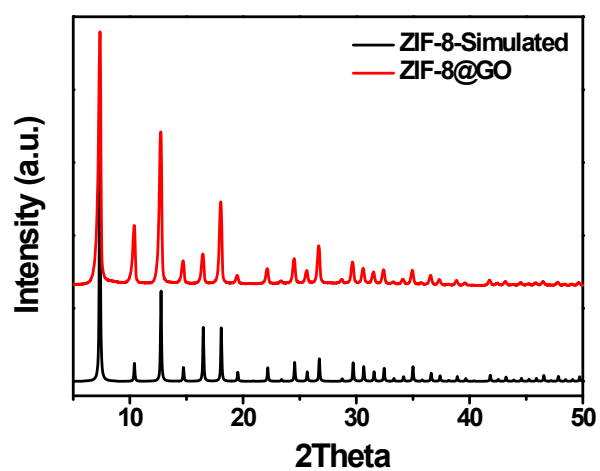

Figure S1 The XRD pattern of simulated ZIF-8 and ZIF-8@GO.

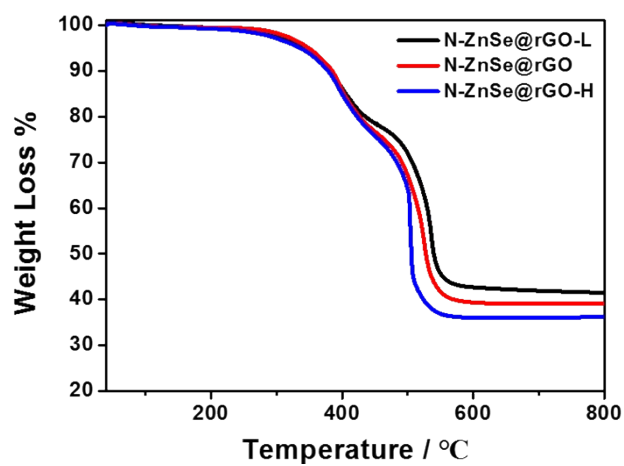

Figure S2 TGA plots of N-ZnSe@rGO-L, N-ZnSe@rGO and N-ZnSe@rGO-H.

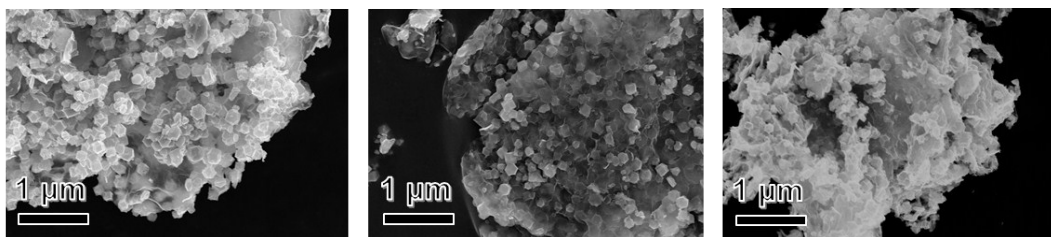

Figure S3 SEM images of (a) N-ZnSe@rGO-L, (b) N-ZnSe@rGO and (c) N-ZnSe@rGO-H.

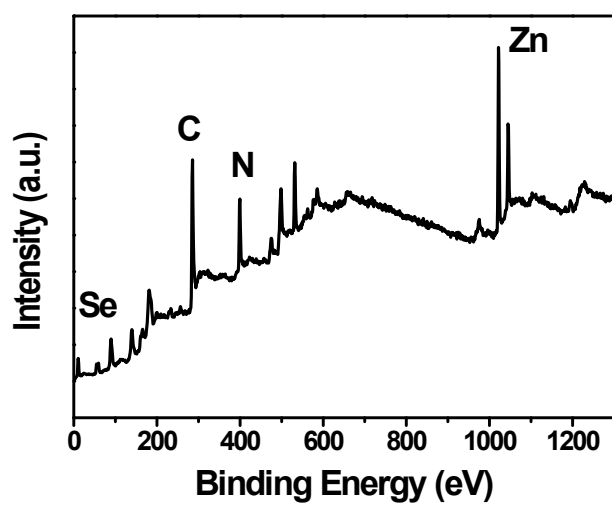

Figure S4 The XPS survey spectrum of N-ZnSe@rGO.

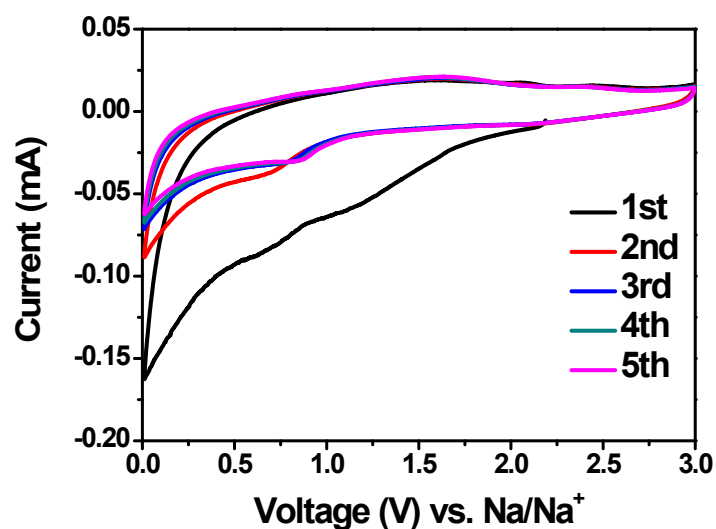

Figure S5 Cyclic voltammetry curves scanned at a rate of  $0.01 \text{ mV s}^{-1}$  in the voltage window of 0.01-3.0 V.

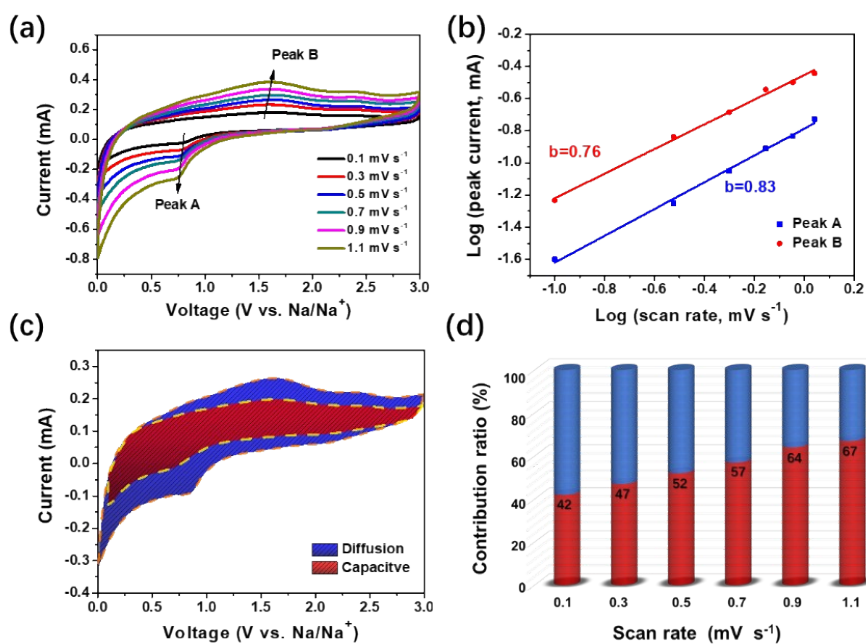

Figure S6. Kinetic analysis of N-ZnSe@rGO electrode for SIBs. (a) CV curves at different scan rates ranging from 0.1 to  $1.1 \text{ mV s}^{-1}$ , (b) Calculation of the b values by plotting  $\log i$  vs.  $\log v$  plots, (c) Capacitive and diffusion contribution to the charge storage process at the scan rate of  $0.5 \text{ mV s}^{-1}$ , (d) The percentage of capacitive contributions with sweep rates from 0.1 to  $1.1 \text{ mV s}^{-1}$ .

Table S1 Equivalent circuit parameters collected from fitting the impedance spectra of the N-ZnSe@rGO

| Sample     | Battery type | $R_s$ ( $\Omega$ ) | $R_{ct}$ ( $\Omega$ ) |
|------------|--------------|--------------------|-----------------------|
| N-ZnSe@rGO | Lithium      | 3.4                | 148.7                 |
|            | Sodium       | 6.2                | 239.9                 |

$R_s$  is the combination of electrolyte resistance and ohmic resistance of cell components,  $R_{ct}$  is represented for the charge-transfer resistance of electrochemical reactions.

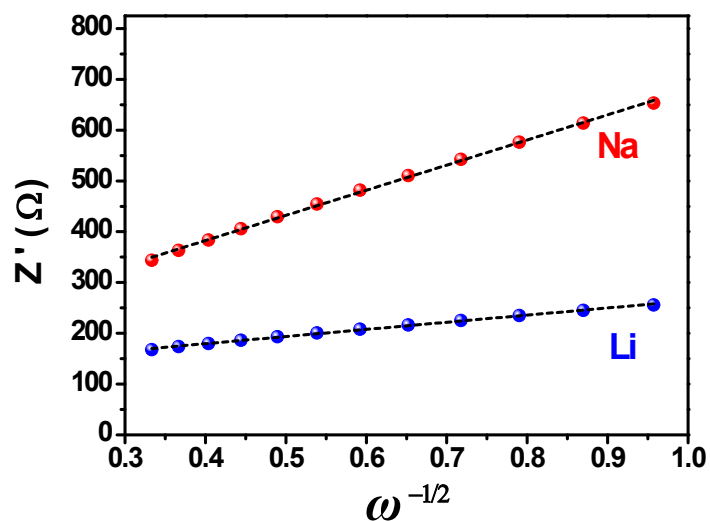

Figure S7 Real parts of the impedance ( $Z'$ ) versus the reciprocal square root of the angular frequency ( $\omega^{-1/2}$ ) in low frequency region of the above N-ZnSe@rGO electrode.
